# Supplementary material
Source: PubMed Central journal article supplement (PMC4015189)

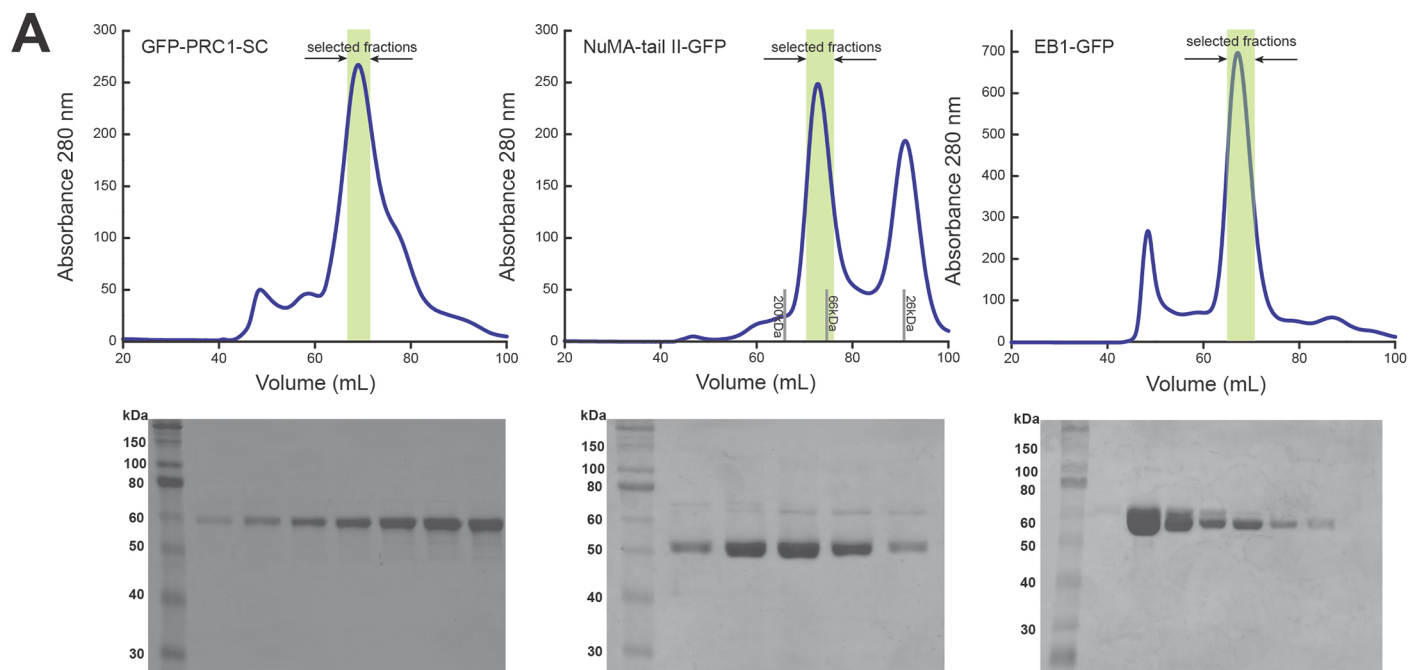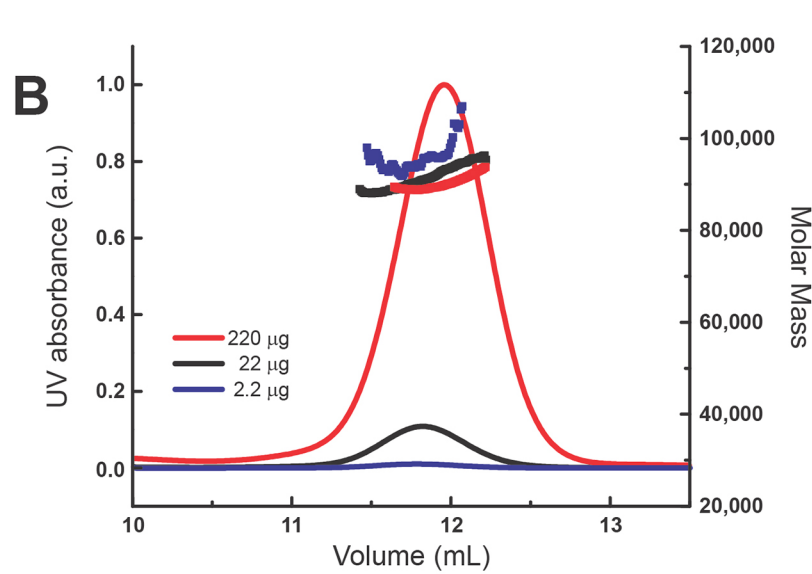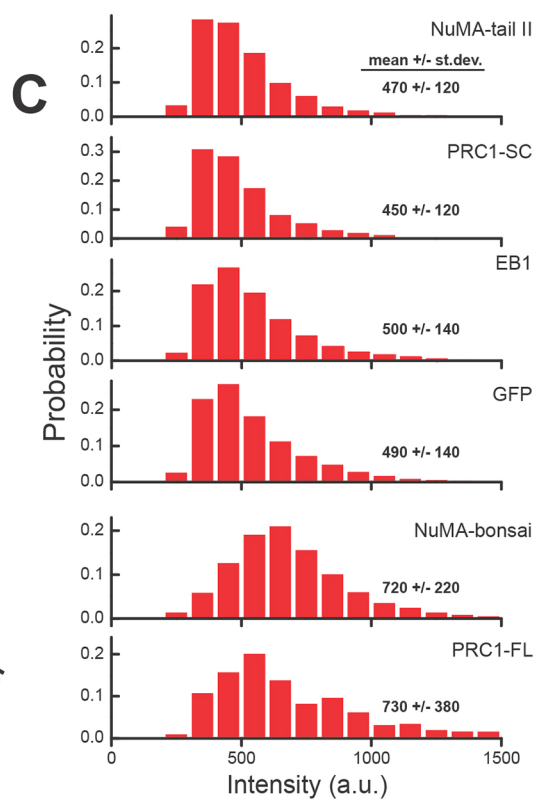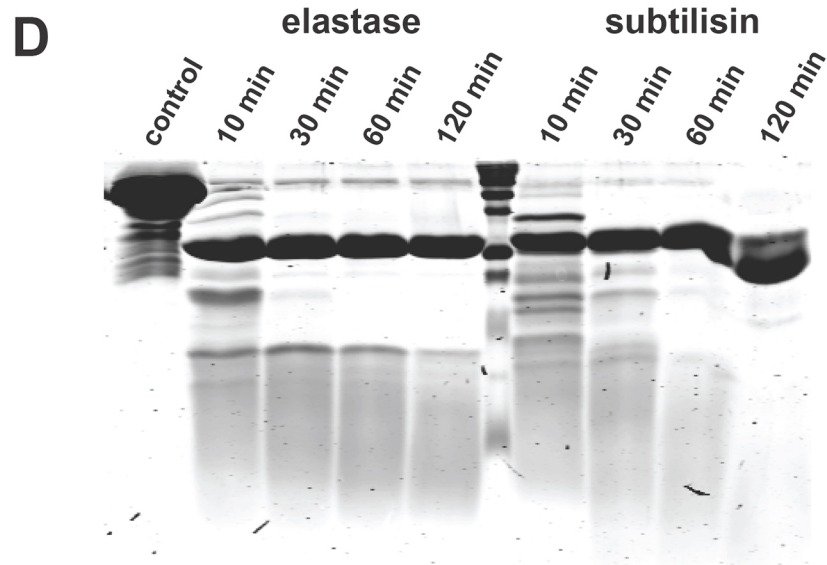

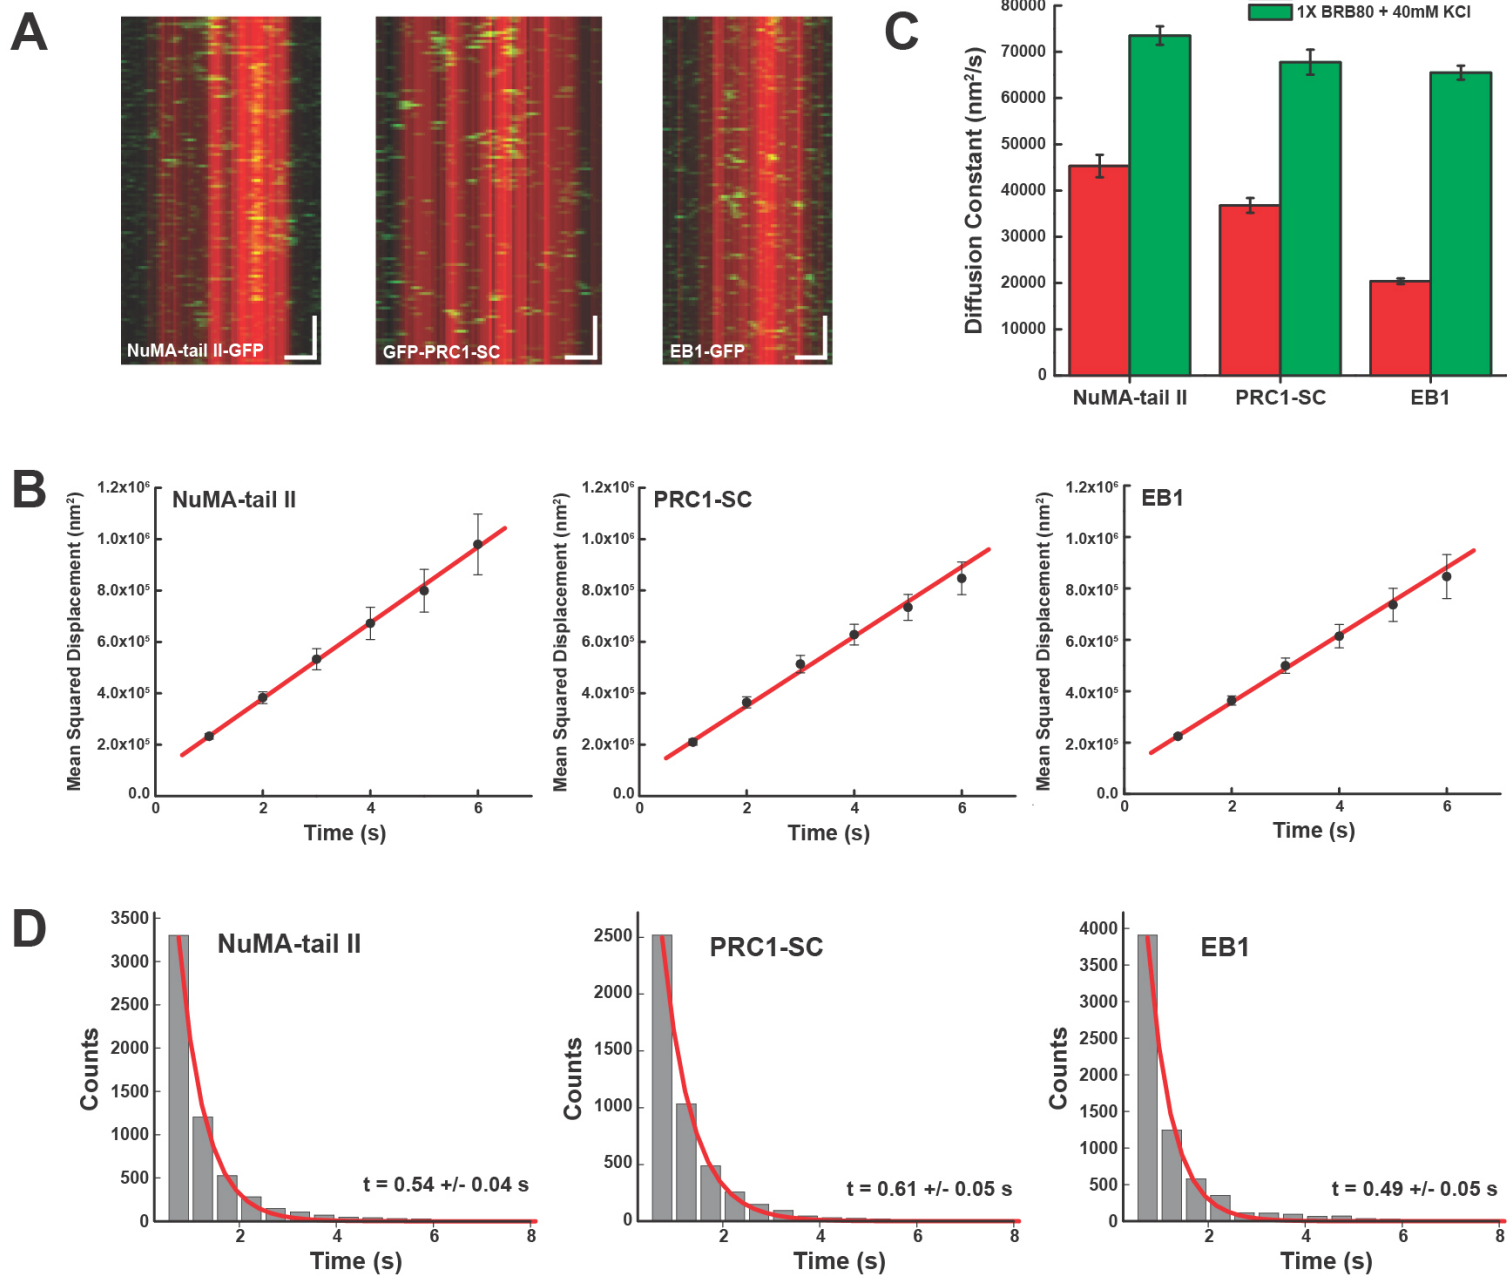

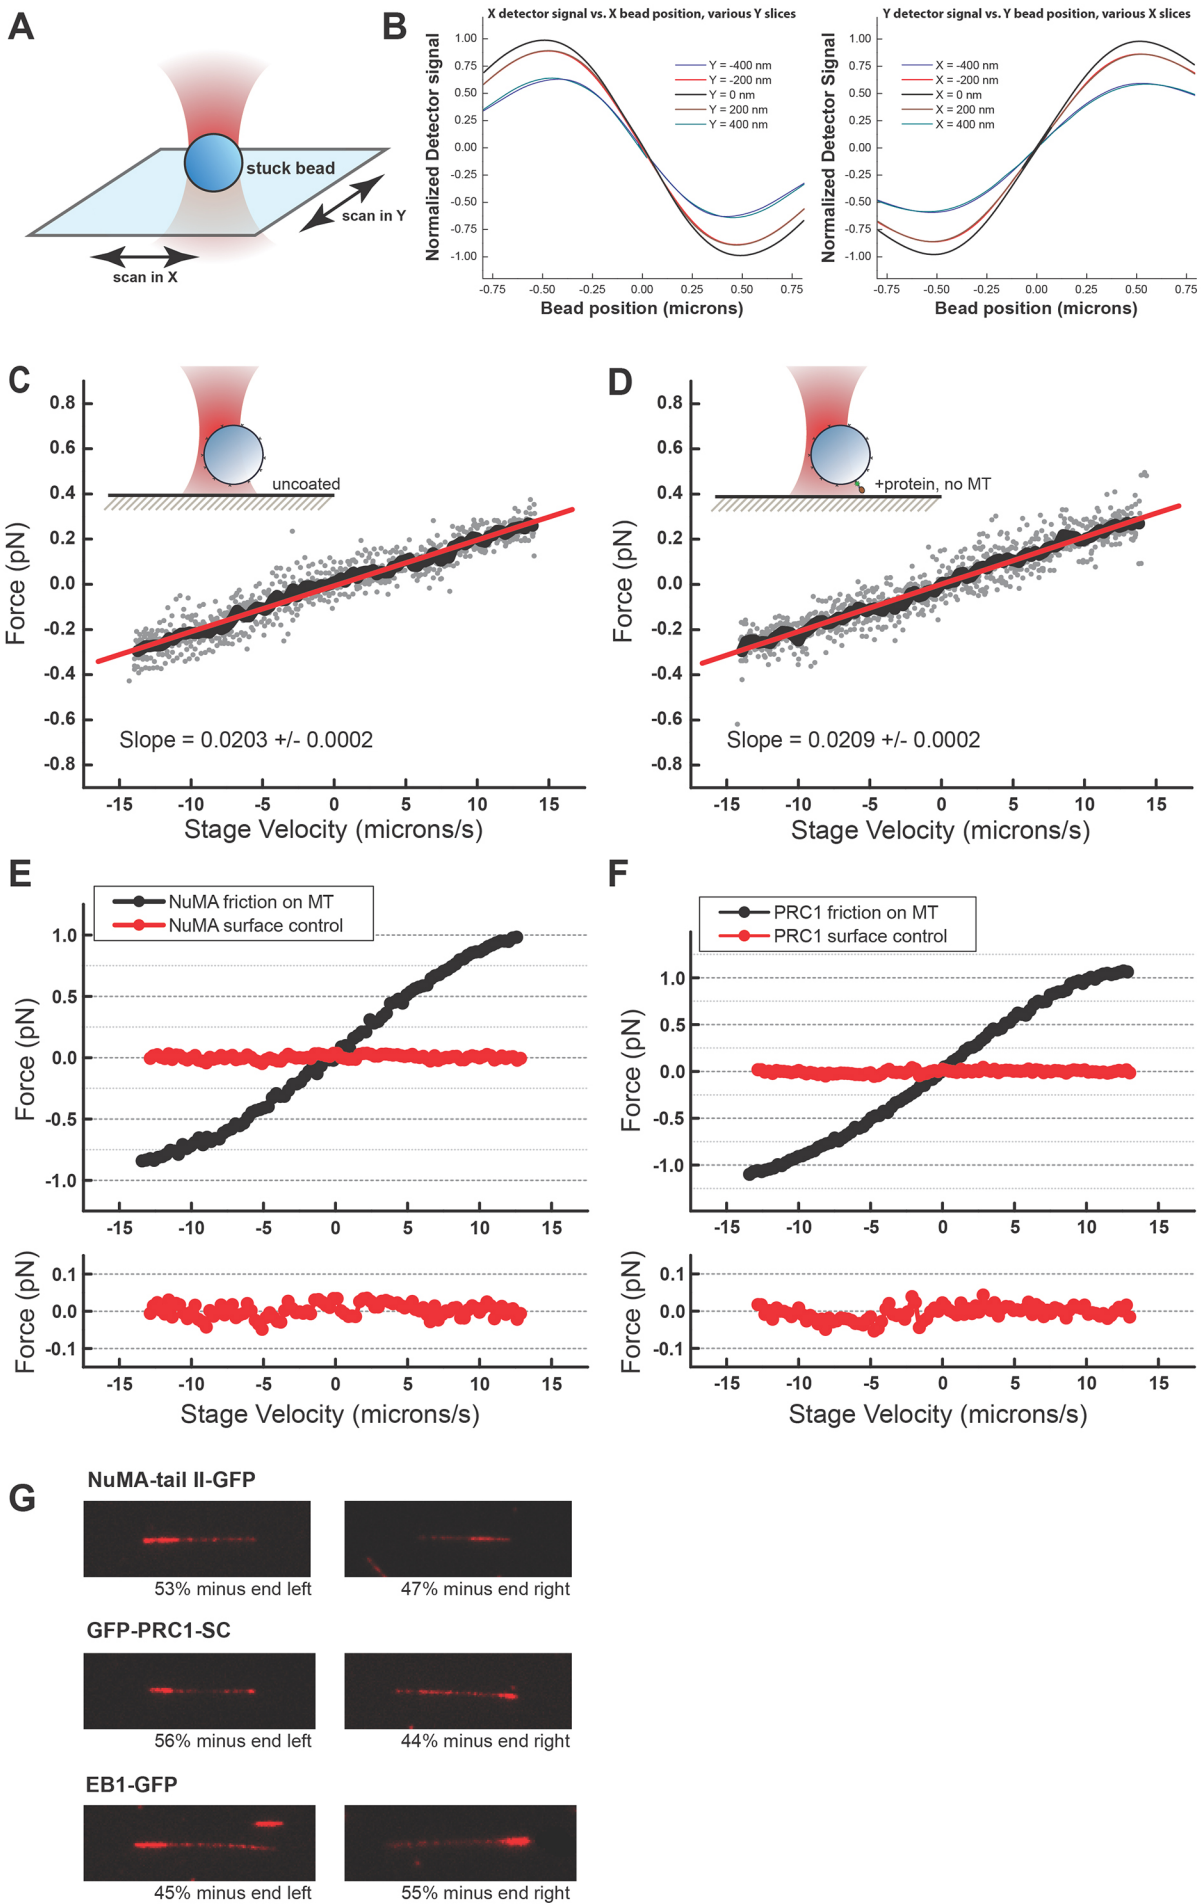

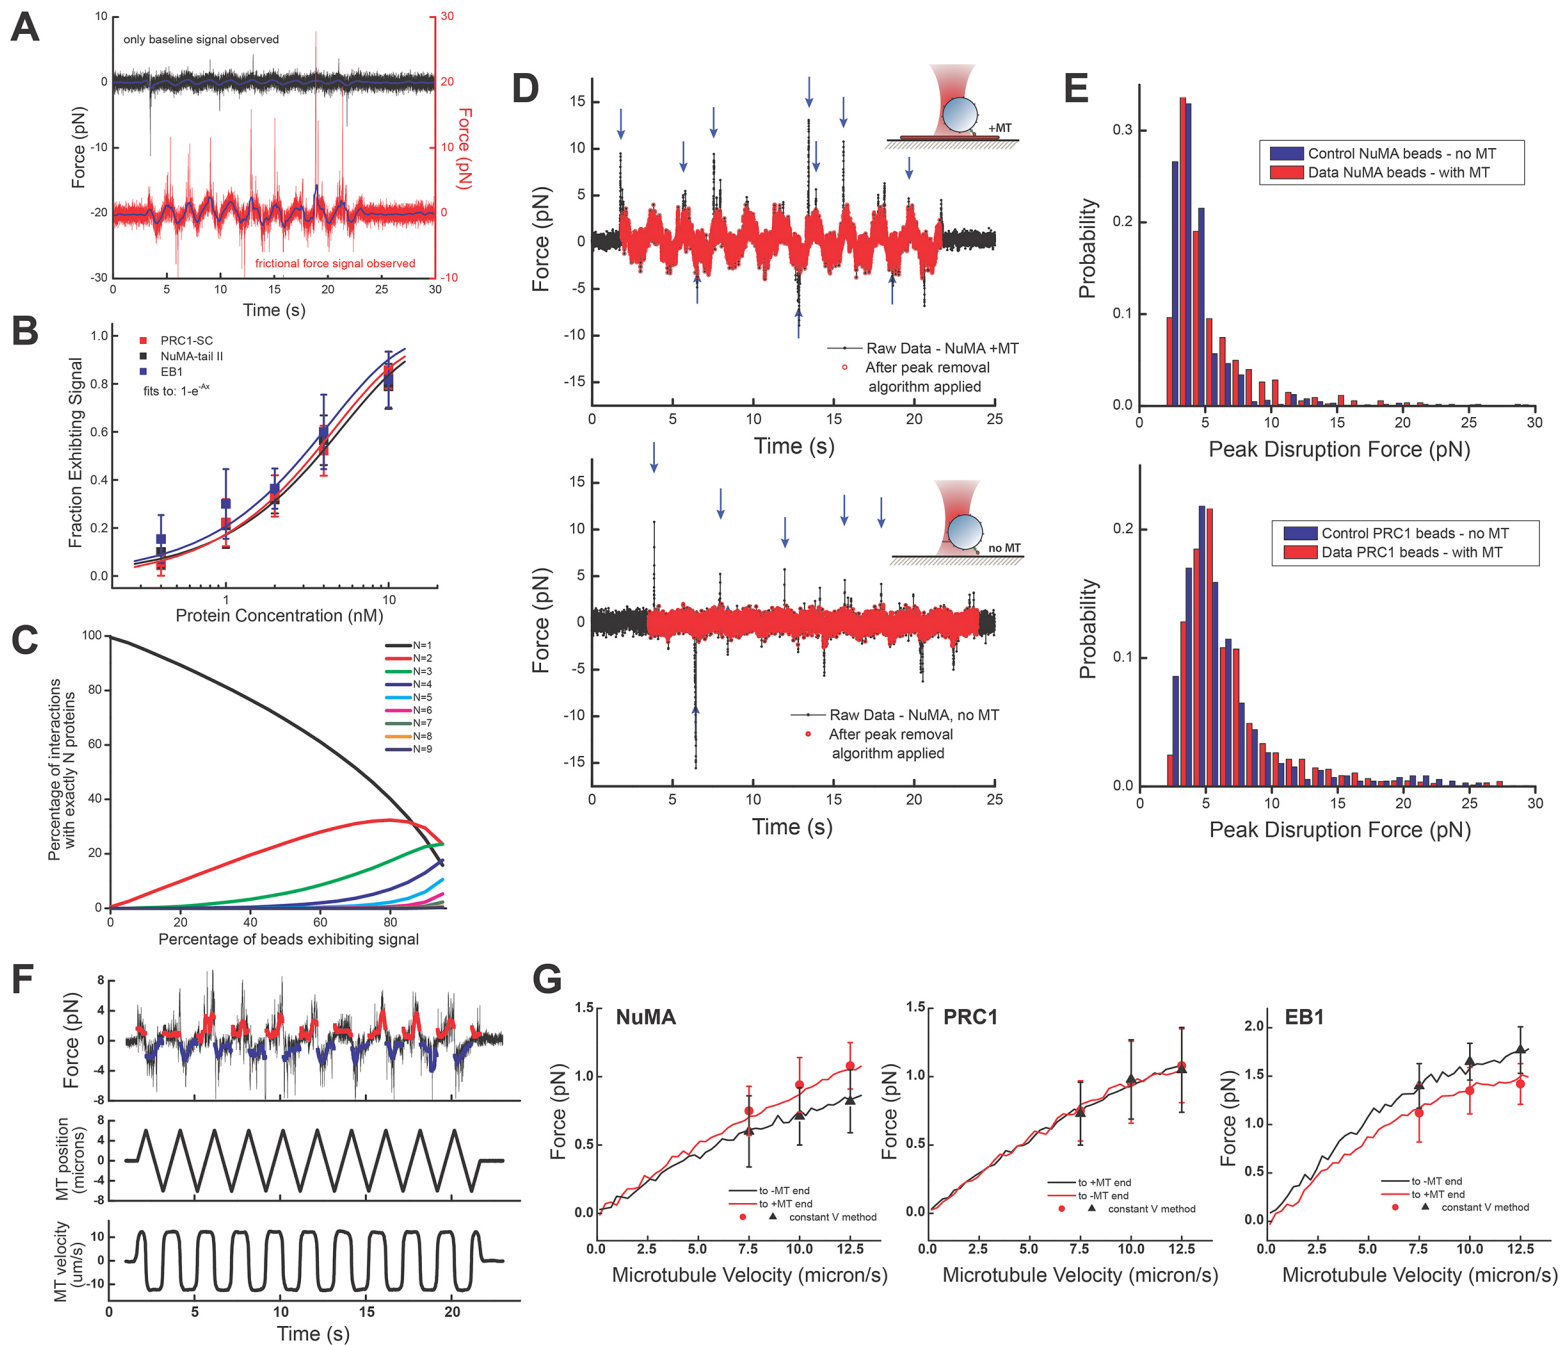

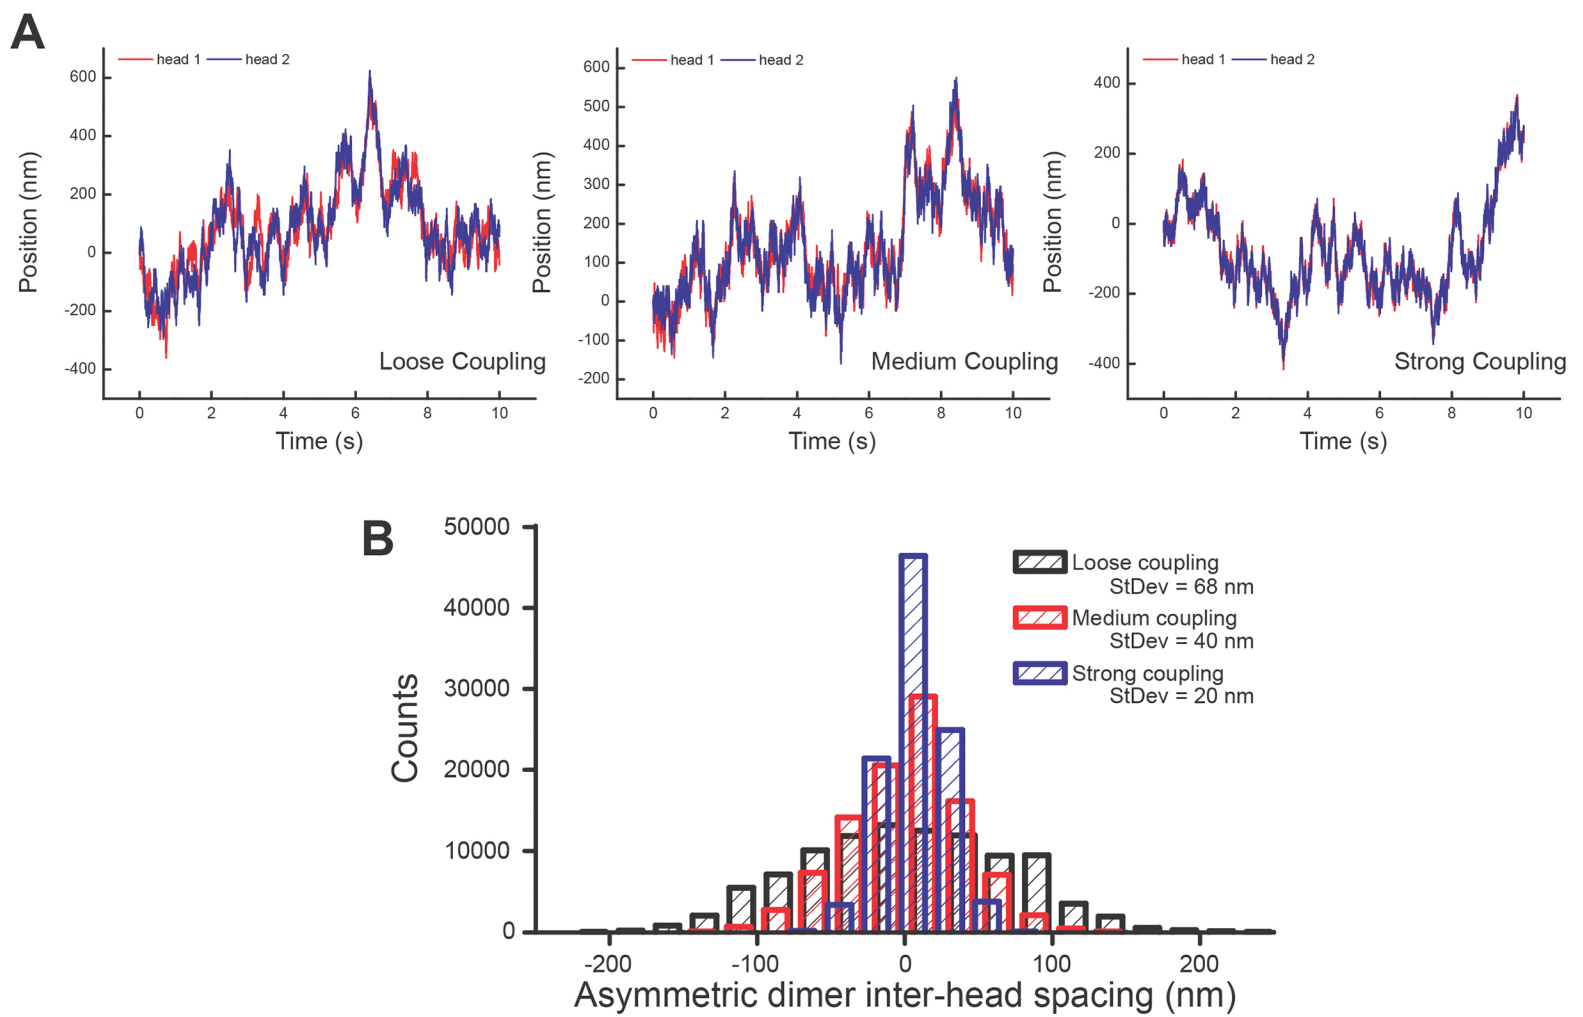

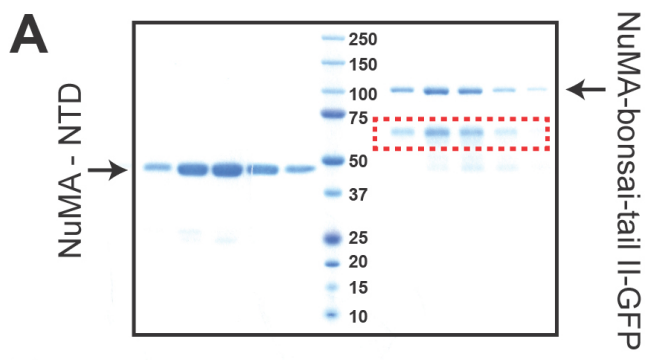

**B**

| Accession      | Description                                                                          | Score    | Coverage | # Proteins | # Unique Peptides | # Peptides | # PSMs | Area     | # AAs | MW [kDa] |
|----------------|--------------------------------------------------------------------------------------|----------|----------|------------|-------------------|------------|--------|----------|-------|----------|
| Q9BTE9         | NUMA1 protein OS=Homo sapiens GN=NUMA1 PE=2 SV=1 - [Q9BTE9_HUMAN]                    | 11365.81 | 37.79    | 21         | 48                | 48         | 400    | 5.125E10 | 979   | 109.2    |
| CON_00019359.3 | SWISS-PROT:P35527 Tax_id=9606 Gene_Symbol=KRT9 Keratin, type I cytoskeletal 9        | 1403.76  | 43.18    | 3          | 13                | 13         | 23     | 1.297E8  | 623   | 62.1     |
| CON_GFP1       | GENBANK ABG78037.1                                                                   | 847.14   | 71.01    | 2          | 11                | 11         | 25     | 6.103E8  | 238   | 26.8     |
| P04264         | Keratin, type II cytoskeletal 1 OS=Homo sapiens GN=KRT1 PE=1 SV=6 - [K2C1_HUMAN]     | 800.94   | 31.52    | 44         | 13                | 14         | 24     | 7.249E7  | 644   | 66.0     |
| CON_Trypsin    | Trypsin - Sus scrofa (Pig). - [SWISS-PROT:P00761 TRY_PIG]                            | 489.38   | 20.78    | 1          | 3                 | 3          | 24     | 1.523E10 | 231   | 24.4     |
| IP112345678    | Streptavidin (S.avidinii) - [CON_Streptavidin]                                       | 297.36   | 36.25    | 1          | 3                 | 3          | 6      | 2.204E7  | 180   | 16.6     |
| P35908         | Keratin, type II cytoskeletal 2 epidermal OS=Homo sapiens GN=KRT2 PE=1 SV=2 - [K22E_ | 160.19   | 6.73     | 6          | 1                 | 2          | 4      | 5.329E7  | 639   | 65.4     |
| Q86Y23         | Hornerin OS=Homo sapiens GN=HRNR PE=1 SV=2 - [HORN_HUMAN]                            | 92.44    | 3.09     | 1          | 2                 | 2          | 4      | 5.291E6  | 2850  | 282.2    |
| P13645         | Keratin, type I cytoskeletal 10 OS=Homo sapiens GN=KRT10 PE=1 SV=6 - [K1C10_HUMA     | 92.12    | 9.25     | 2          | 2                 | 2          | 3      | 2.048E7  | 584   | 58.8     |
| P52292         | Importin subunit alpha-2 OS=Homo sapiens GN=KPNA2 PE=1 SV=1 - [IMA2_HUMAN]           | 42.06    | 3.78     | 1          | 1                 | 1          | 1      | 2.428E7  | 529   | 57.8     |

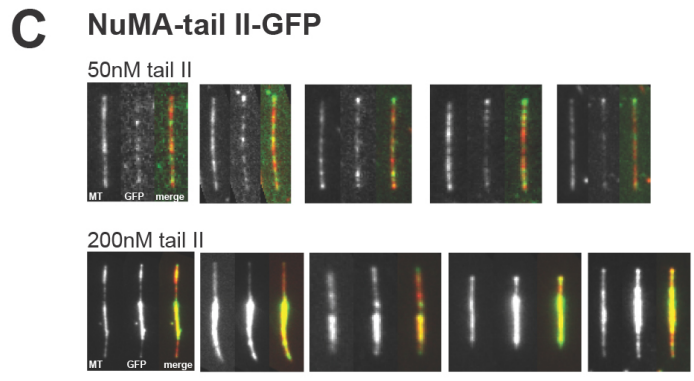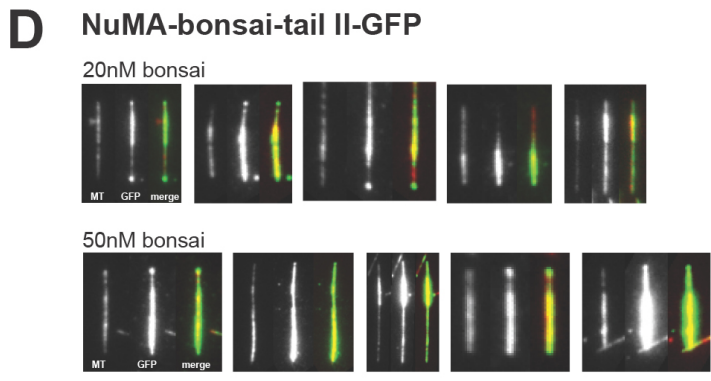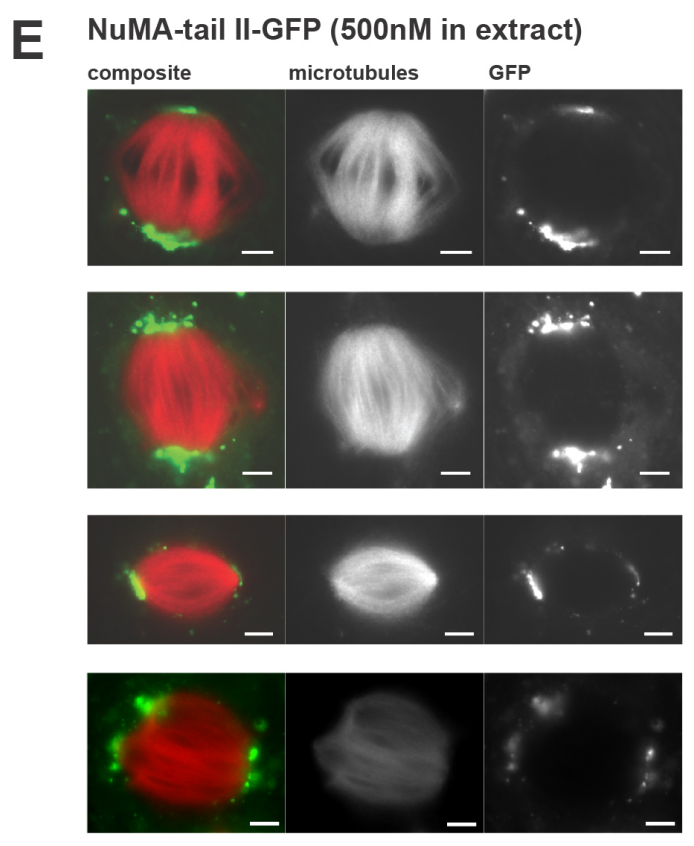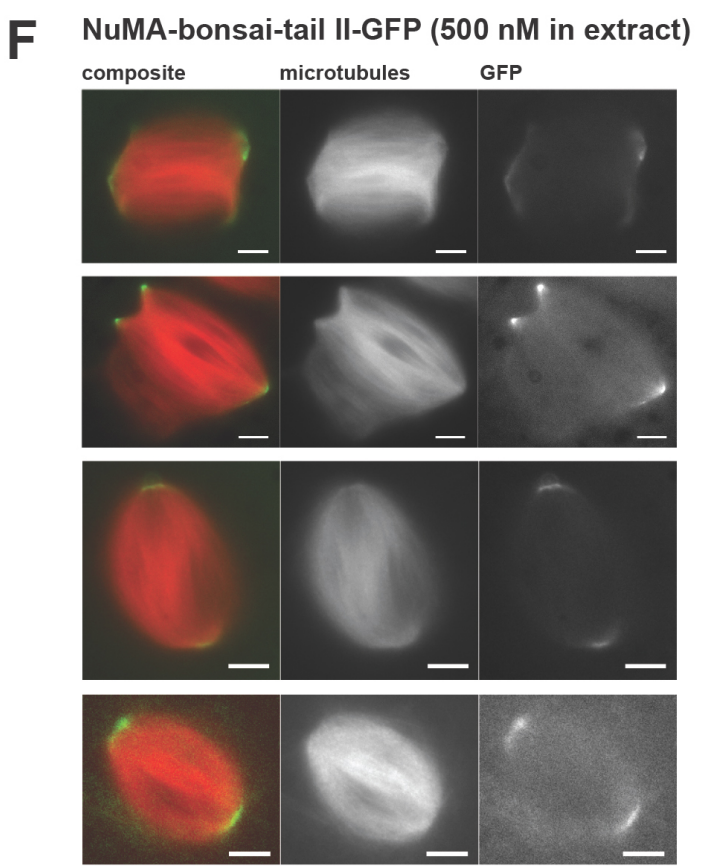

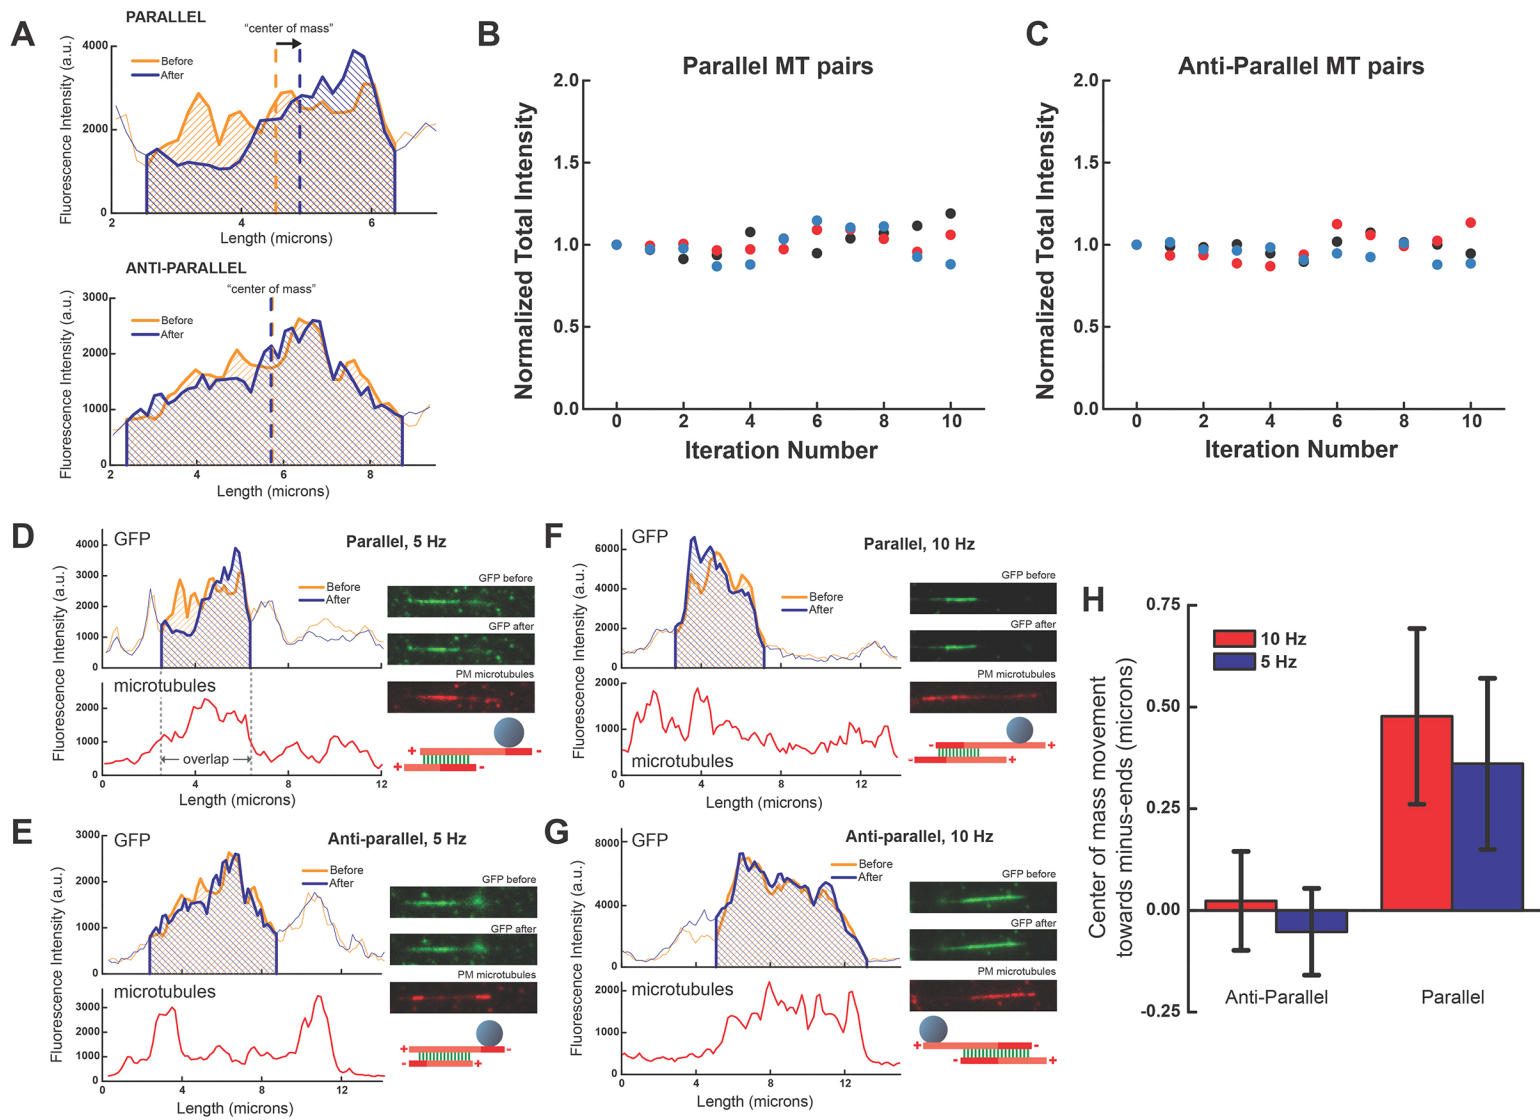

Supplement: NIHMS569105-supplement-02.pdf [file NIHMS569105-supplement-02.pdf]
